# Supplementary material for: Fluorogenic Detection of Sulfite in Water by Using Copper(II) Azacyclam Complexes
Source: MDPI journal article supplement (doi:10.3390/molecules27061852), 2022-03-12
Supplement: s1 [file s1]

# FLUOROGENIC DETECTION OF SULFITE IN WATER BY USING A COPPER(II) AZACYCLAM COMPLEXES

Carlo Ciarrocchi, Donatella Sacchi, Massimo Boiocchi, Maduka L. Weththimuni, Alessio Orbelli Biroli, Maurizio Licchelli

## SUPPLEMENTARY INFORMATION

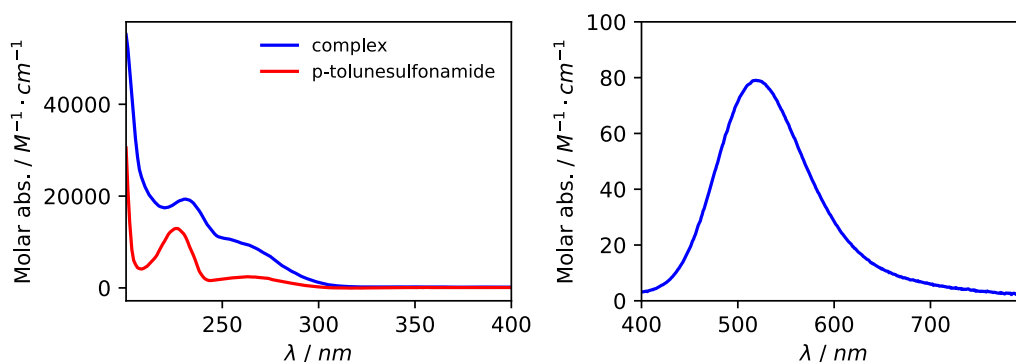

**Figure S1.** Absorption spectra of complex [Cu(1)]<sup>2+</sup> in aqueous solution 2 × 10<sup>-5</sup> M (left) and 2 × 10<sup>-4</sup> M (right). Spectrum of p-toluenesulfonamide is also reported (left) for comparison.

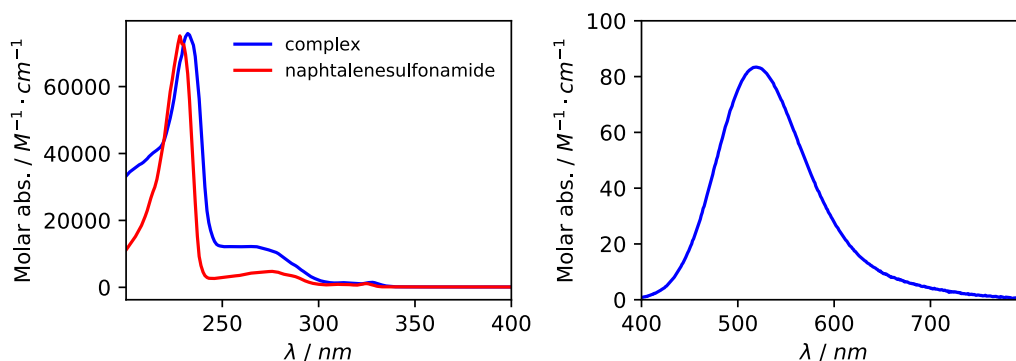

**Figure S2.** Absorption spectra of complex [Cu(2)]<sup>2+</sup> in aqueous solution 2 × 10<sup>-5</sup> M (left) and 2 × 10<sup>-4</sup> M (right). Spectrum of 2-naphthalenesulfonamide is also reported (left) for comparison.

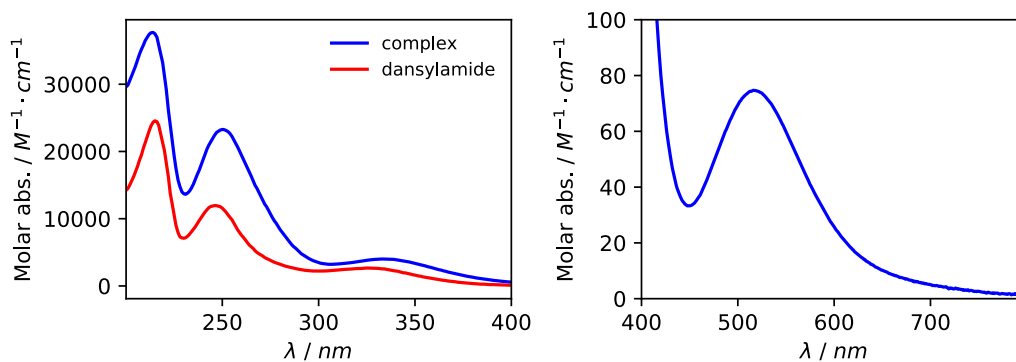

**Figure S3.** Absorption spectra of complex [Cu(3)]<sup>2+</sup> in aqueous solution 2 × 10<sup>-5</sup> M (left) and 2 × 10<sup>-4</sup> M (right). Spectrum of dansylamide is also reported (left) for comparison.

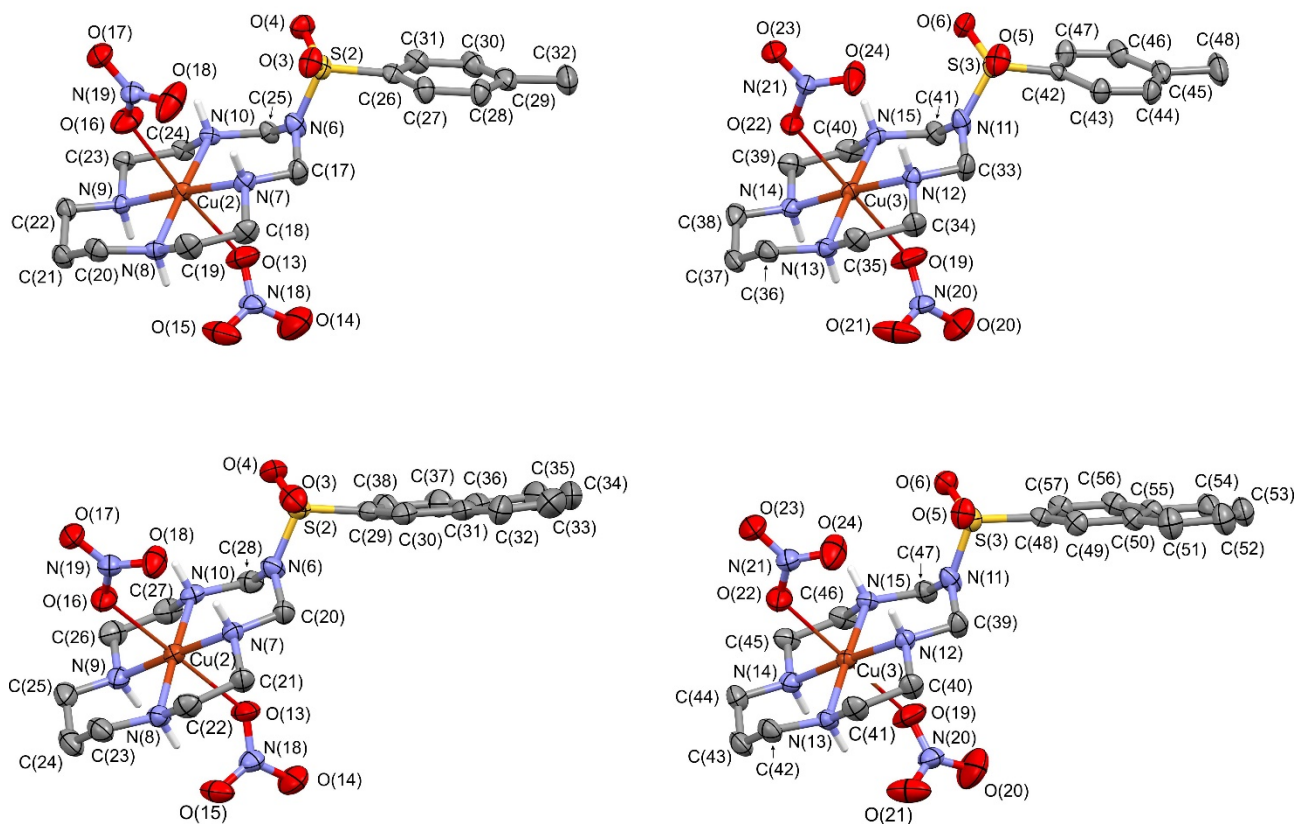

**Figure S4.** Plot showing thermal ellipsoids for the other independent azacyclam ligands occurring in the  $3[[\text{Cu}(\mathbf{1})](\text{NO}_3)_2]$  (top) and  $3[[\text{Cu}(\mathbf{2})](\text{NO}_3)_2] \cdot 2\text{H}_2\text{O}$  (bottom) crystals (ellipsoids are drawn at the 30% probability level; only H bonded to the secondary amines are shown). Weak axial Cu-O bond interactions are drawn as thin sticks.

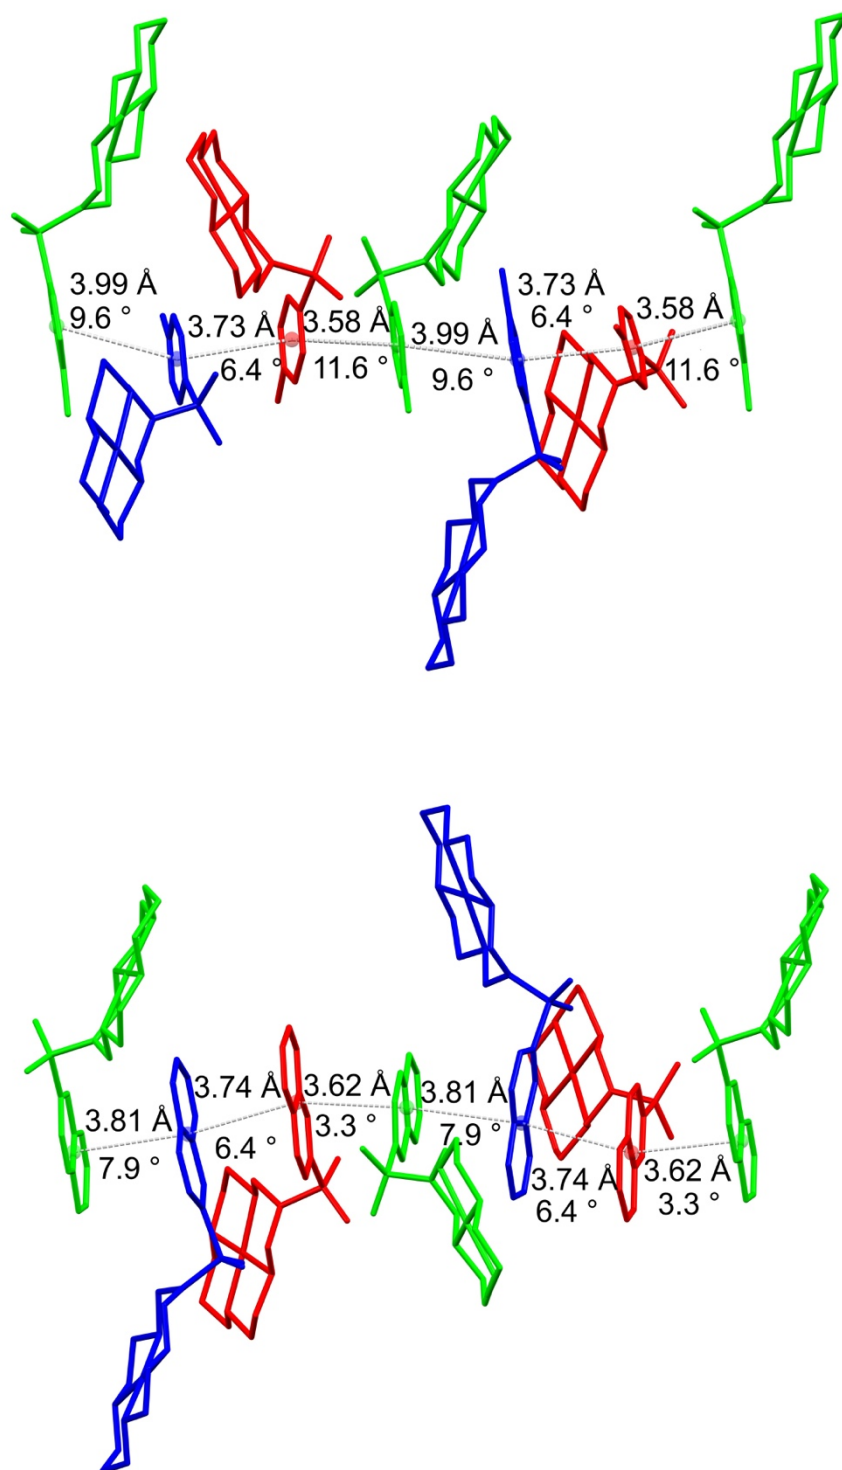

**Figure S5.** Simplified sketches of the supramolecular chains maintained by face-to-face  $\pi$ -stacking interactions in the 3[[Cu(1)](NO<sub>3</sub>)<sub>2</sub>] (top) and 3[[Cu(2)](NO<sub>3</sub>)<sub>2</sub>] $\cdot$ 2H<sub>2</sub>O] (bottom) crystals (H-atoms, nitrate counterions and water solvent molecules are omitted for clarity; symmetrically equivalent molecules have the same colour). The numerical values refer to the centroid-centroid separations (drawn as dashed lines) and to the dihedral angles between facing aromatic rings.

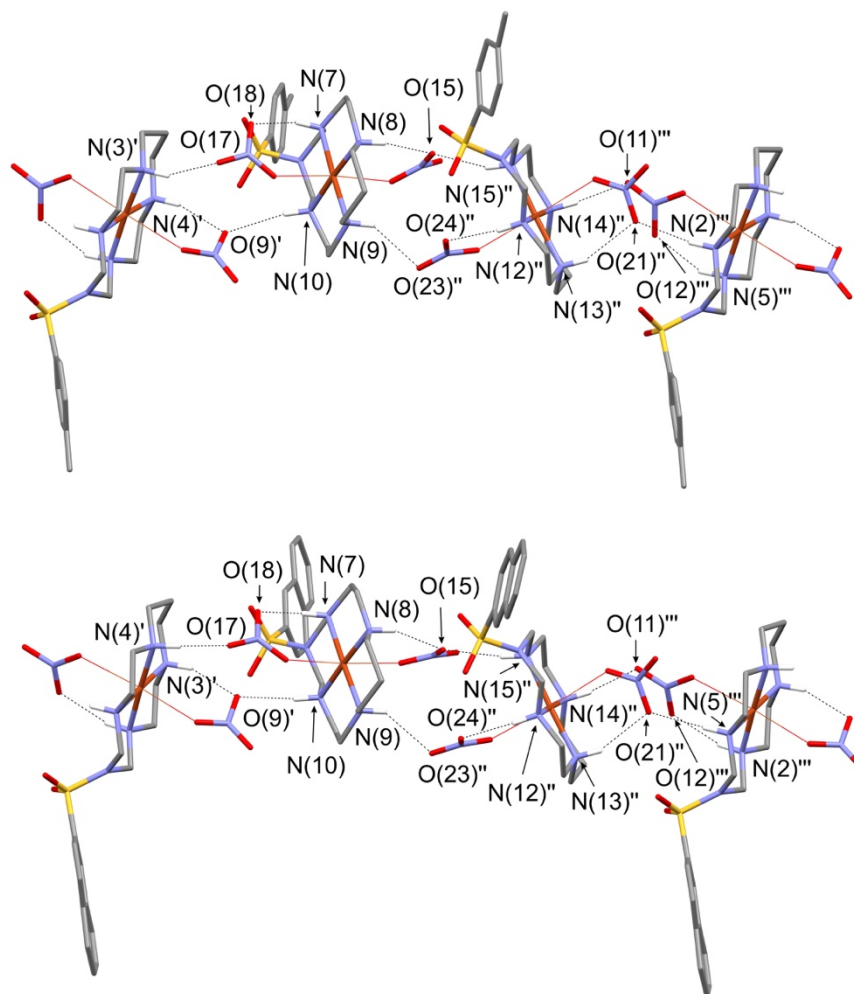

**Figure S6.** Simplified sketches of the N-H $\cdots$ O H-bonds in the 3[[Cu(1)](NO<sub>3</sub>)<sub>2</sub>] (top) and 3[[Cu(2)](NO<sub>3</sub>)<sub>2</sub>] $\cdot$ 2H<sub>2</sub>O (bottom) crystals (only H-atoms involved in H-bonds are drawn, water solvent molecules are omitted for clarity). Atom names identify the independent N-H $\cdots$ O interactions, drawn as dashed lines. Symmetry code: for top (') =  $x, \frac{1}{2}-y, -\frac{1}{2}+z$ ; (") =  $1-x, \frac{1}{2}+y, \frac{1}{2}-z$ ; (""') =  $x, \frac{3}{2}-y, -\frac{1}{2}+z$ ; for bottom (') =  $\frac{1}{2}+x, \frac{1}{2}-y, -z$ ; (") =  $1-x, \frac{1}{2}+y, \frac{1}{2}-z$ ; (""') =  $\frac{1}{2}+x, \frac{3}{2}-y, -z$ .

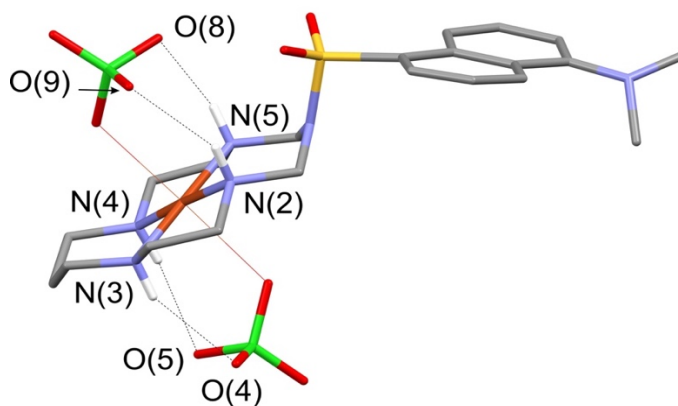

**Figure S7.** A simplified sketch of the N-H $\cdots$ O H-bonds occurring in the [Cu(3)](ClO<sub>4</sub>)<sub>2</sub> crystal (only H-atoms involved in H-bonds are drawn). Atom names are reported only for N and O species involved in H-bonds, drawn as dashed lines.

**Table S1.** Geometrical features of the N-H···O H-bonds occurring in the studied crystals. Atom names refer to the atom positions shown in Figure S6 and S7.

| D donor group                                                                                                                                  | D···A [Å] | H···A [Å] | D-H···A [°] | A acceptor atom |
|------------------------------------------------------------------------------------------------------------------------------------------------|-----------|-----------|-------------|-----------------|
| 3[[Cu(1)](NO <sub>3</sub> ) <sub>2</sub> ]                                                                                                     |           |           |             |                 |
| N(2)'''-H(2N)'''                                                                                                                               | 3.051(6)  | 2.21(2)   | 155(4)      | O(21)''         |
| N(3)''-H(3N)'                                                                                                                                  | 2.949(5)  | 2.13(3)   | 152(4)      | O(17)           |
| N(4)''-H(4N)'                                                                                                                                  | 2.989(6)  | 2.13(2)   | 161(4)      | O(9)'           |
| N(5)'''-H(5N)'''                                                                                                                               | 2.975(6)  | 2.14(2)   | 154(4)      | O(12)'''        |
| N(7)-H(7N)                                                                                                                                     | 3.044(6)  | 2.21(2)   | 154(4)      | O(18)           |
| N(8)-H(8N)                                                                                                                                     | 3.106(6)  | 2.30(3)   | 150(4)      | O(15)           |
| N(9)-H(9N)                                                                                                                                     | 3.091(5)  | 2.32(3)   | 144(4)      | O(23)''         |
| N(10)-H(10N)                                                                                                                                   | 3.158(5)  | 2.28(2)   | 168(4)      | O(9)'           |
| N(12)''-H(12N)''                                                                                                                               | 2.951(6)  | 2.11(2)   | 156(4)      | O(24)''         |
| N(13)''-H(13N)''                                                                                                                               | 3.166(7)  | 2.34(2)   | 153(4)      | O(21)''         |
| N(14)''-H(14N)''                                                                                                                               | 3.066(6)  | 2.26(3)   | 150(4)      | O(11)'''        |
| N(15)''-H(15N)''                                                                                                                               | 2.994(6)  | 2.15(2)   | 157(4)      | O(15)           |
| Symmetry code: (') = $x, \frac{1}{2}-y, -\frac{1}{2}+z$ ; (') = $1-x, \frac{1}{2}+y, \frac{1}{2}-z$ ; (') = $x, \frac{3}{2}-y, -\frac{1}{2}+z$ |           |           |             |                 |
| 3[[Cu(2)](NO <sub>3</sub> ) <sub>2</sub> ]·2H <sub>2</sub> O]                                                                                  |           |           |             |                 |
| N(2)'''-H(2N)'''                                                                                                                               | 2.980(7)  | 2.11(2)   | 165(5)      | O(12)'''        |
| N(3)''-H(3N)'                                                                                                                                  | 3.008(7)  | 2.18(3)   | 154(5)      | O(9)'           |
| N(4)''-H(4N)'                                                                                                                                  | 3.042(6)  | 2.21(2)   | 155(4)      | O(17)           |
| N(5)'''-H(5N)'''                                                                                                                               | 3.058(6)  | 2.19(2)   | 163(4)      | O(21)''         |
| N(7)-H(7N)                                                                                                                                     | 2.975(6)  | 2.12(2)   | 158(5)      | O(18)           |
| N(8)-H(8N)                                                                                                                                     | 3.013(6)  | 2.17(3)   | 156(5)      | O(15)           |
| N(9)-H(9N)                                                                                                                                     | 3.038(7)  | 2.30(4)   | 140(5)      | O(23)''         |
| N(10)-H(10N)                                                                                                                                   | 2.993(6)  | 2.10(2)   | 170(5)      | O(9)'           |
| N(12)''-H(12N)''                                                                                                                               | 2.998(7)  | 2.16(2)   | 156(4)      | O(24)''         |
| N(13)''-H(13N)''                                                                                                                               | 3.150(7)  | 2.31(2)   | 155(5)      | O(21)''         |
| N(14)''-H(14N)''                                                                                                                               | 3.014(6)  | 2.23(3)   | 145(5)      | O(11)'''        |
| N(15)''-H(15N)''                                                                                                                               | 3.094(6)  | 2.21(2)   | 172(5)      | O(15)           |
| Symmetry code: (') = $\frac{1}{2}+x, \frac{1}{2}-y, -z$ ; (') = $1-x, \frac{1}{2}+y, \frac{1}{2}-z$ ; (') = $\frac{1}{2}+x, \frac{3}{2}-y, -z$ |           |           |             |                 |
| [Cu(3)](ClO <sub>4</sub> ) <sub>2</sub>                                                                                                        |           |           |             |                 |
| N(2)-H(2N)                                                                                                                                     | 3.100(3)  | 2.31(2)   | 147(2)      | O(9)            |
| N(3)-H(3N)                                                                                                                                     | 3.151(3)  | 2.33(2)   | 155(2)      | O(4)            |
| N(4)-H(4N)                                                                                                                                     | 3.152(3)  | 2.35(2)   | 151(2)      | O(5)            |
| N(5)-H(5N)                                                                                                                                     | 3.237(3)  | 2.47(2)   | 145(2)      | O(8)            |

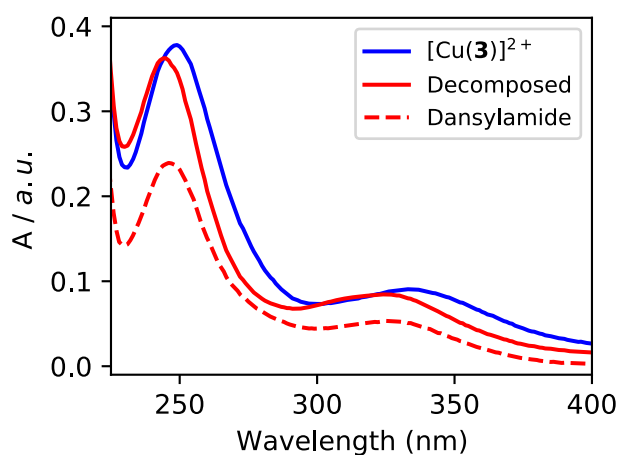

**Figure S8.** Absorption spectra of complex  $[\text{Cu}(\mathbf{3})]^{2+}$  in aqueous solution ( $2 \times 10^{-5}$  M) before and after decomposition obtained by heating (1 h,  $70^\circ\text{C}$ ,  $\text{pH}=7.2$ ). Spectrum of dansylamide is also reported for comparison.

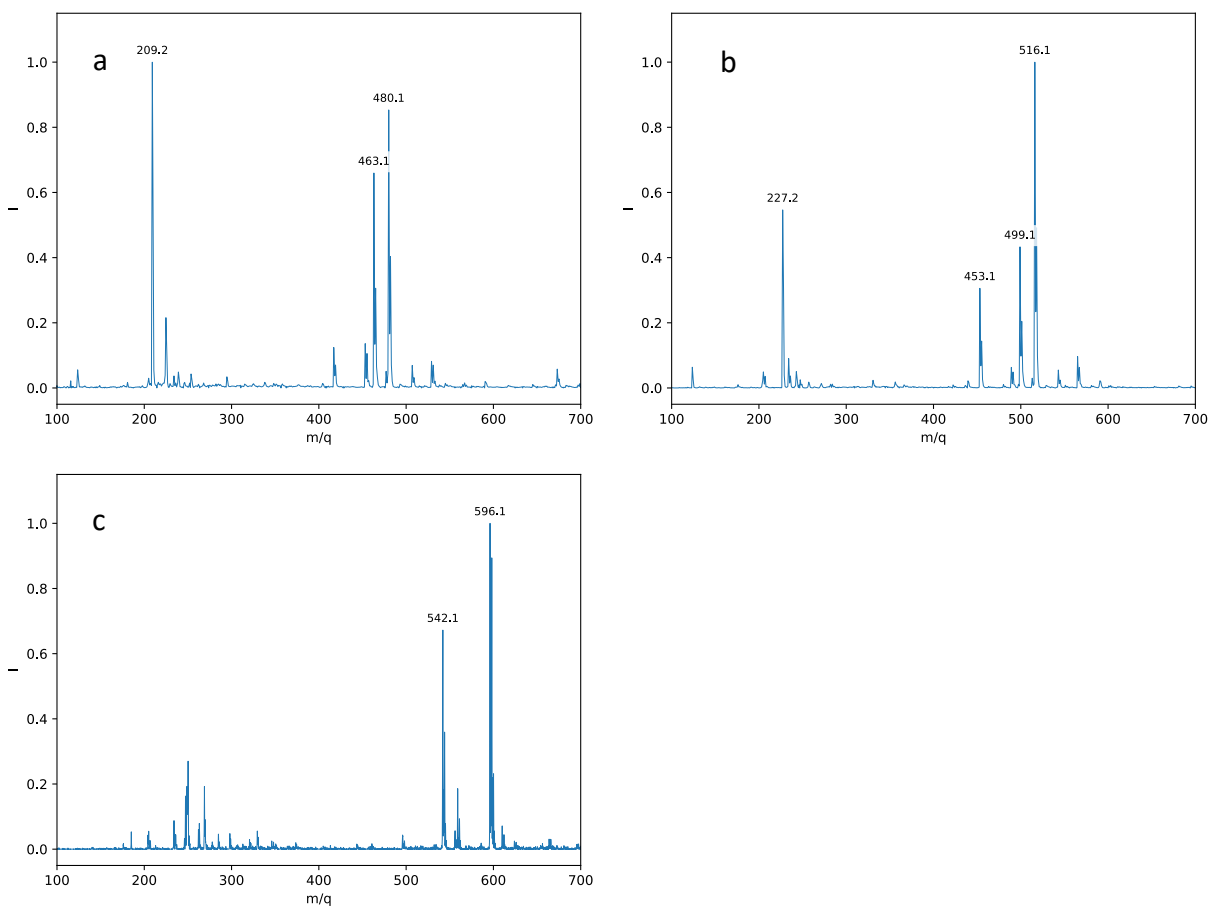

**Figure S9.** ESI-MS spectra of aqueous solutions of (a)  $[\text{Cu}(\mathbf{1})](\text{NO}_3)_2$  ( $m/z = 209$ ,  $\{\text{M}\}^{2+}$ ; 463,  $\{\text{M}+\text{HCOO}\}^+$ ; 480,  $\{\text{M}+\text{NO}_3\}^+$ ;  $\text{M} = [\text{Cu}(\mathbf{1})]^{2+}$ ) (b)  $[\text{Cu}(\mathbf{2})](\text{NO}_3)_2$ , ( $m/z = 227$ ,  $\{\text{M}\}^{2+}$ ; 453,  $\{\text{M}-\text{H}\}^+$ ; 499,  $\{\text{M}+\text{HCOO}\}^+$ ; 516,  $\{\text{M}+\text{NO}_3\}^+$ ;  $\text{M} = [\text{Cu}(\mathbf{2})]^{2+}$ ), and (c)  $[\text{Cu}(\mathbf{3})](\text{ClO}_4)_2$  ( $m/z = 542$ ,  $\{\text{M}+\text{HCOO}\}^+$ ; 596,  $\{\text{M}+\text{ClO}_4\}^+$ ;  $\text{M} = [\text{Cu}(\mathbf{3})]^{2+}$ ).

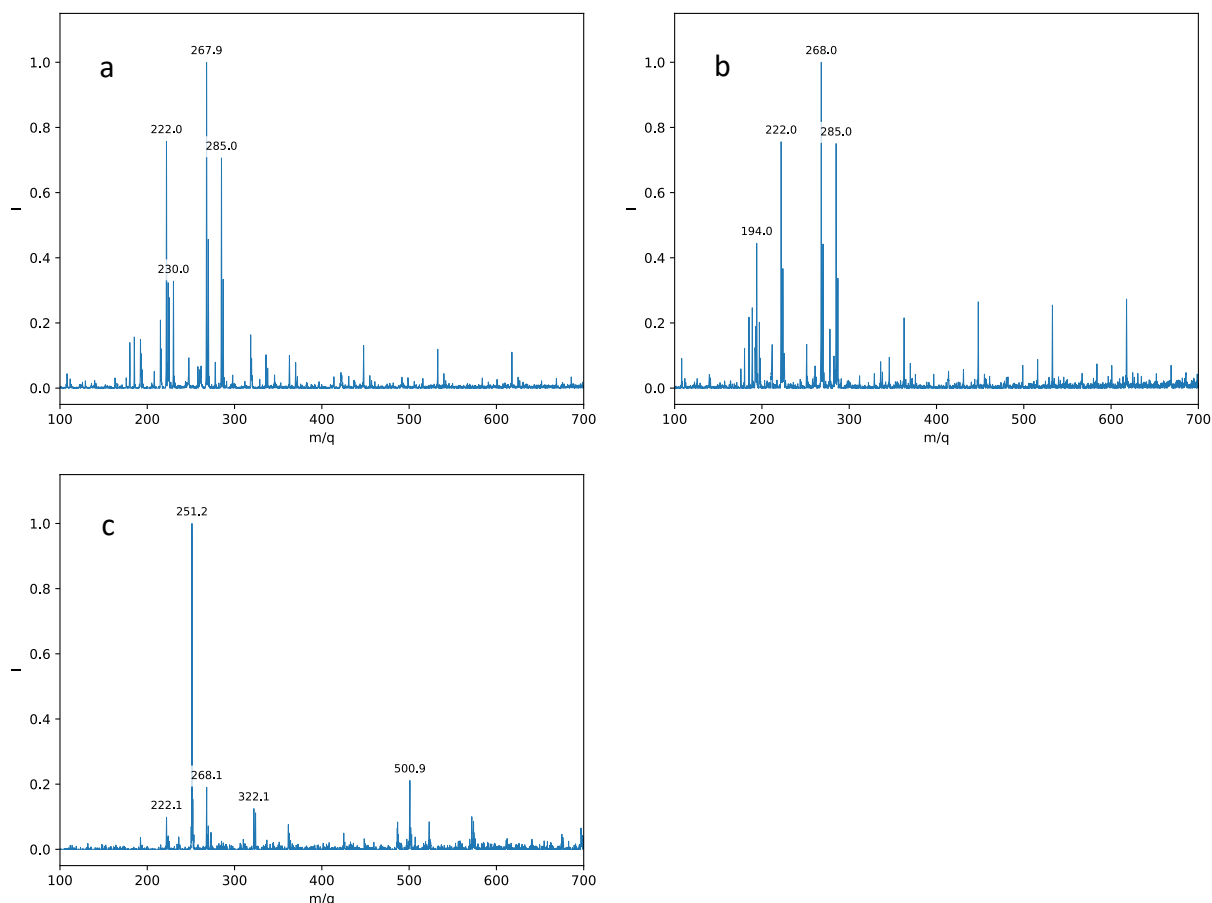

**Figure S10.** ESI-MS spectra of aqueous solutions of the investigated copper(II) azacyclam complexes after 1h heating at 70 °C.

- (a)  $[\text{Cu}(\mathbf{1})](\text{NO}_3)_2$  ( $m/z = 194$ ,  $\{p\text{-toluensulfonamide}+\text{Na}\}^+$ ; 222,  $\{\text{M}-\text{H}\}^+$ ; 268,  $\{\text{M}+\text{HCOO}\}^+$ ; 285  $\{\text{M}+\text{NO}_3\}^+$ ;  $\text{M} = [\text{Cu}(\mathbf{2.3.2}\text{-tet})]^{2+}$ ).
- (b)  $[\text{Cu}(\mathbf{2})](\text{NO}_3)_2$  ( $m/z = 222$ ,  $\{\text{M}-\text{H}\}^+$ ; 230,  $\{2\text{-naphthalenesulfonamide}+\text{Na}\}^+$ ; 268,  $\{\text{M}+\text{HCOO}\}^+$ ; 285  $\{\text{M}+\text{NO}_3\}^+$ ;  $\text{M} = [\text{Cu}(\mathbf{2.3.2}\text{-tet})]^{2+}$ ).
- (c)  $[\text{Cu}(\mathbf{3})](\text{ClO}_4)_2$  ( $m/z = 222$ ,  $\{\text{M}-\text{H}\}^+$ ; 251,  $\{\text{dansylamide}+\text{H}\}^+$ ; 268,  $\{\text{M}+\text{HCOO}\}^+$ ; 322,  $\{\text{M}+\text{ClO}_4\}^+$ ; 501,  $\{2\text{dansylamide}+\text{H}\}^+$ ;  $\text{M} = [\text{Cu}(\mathbf{2.3.2}\text{-tet})]^{2+}$ ).

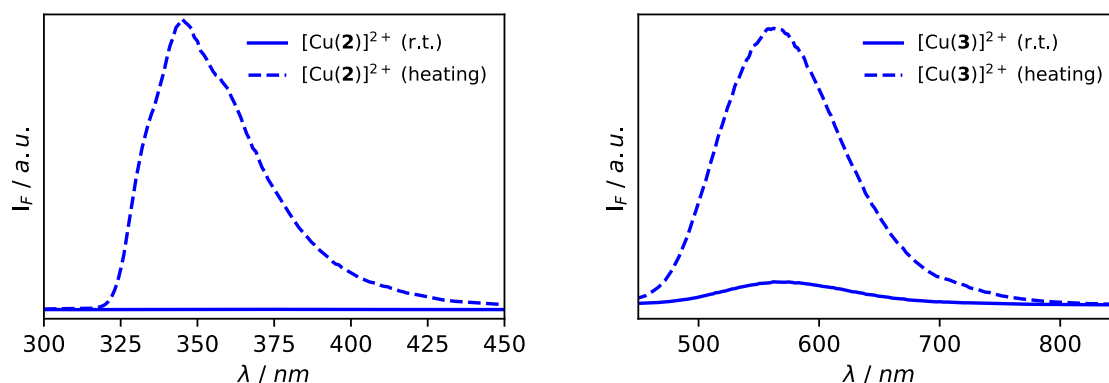

**Figure S11.** Emission spectra of aqueous solutions ( $2 \times 10^{-5}$  M) of  $[\text{Cu}(\mathbf{2})]^{2+}$  (left) and  $[\text{Cu}(\mathbf{3})]^{2+}$  (right) taken at room temperature and after 1h heating at 70 °C ( $\lambda_{\text{exc}} = 275$  and 325 nm, respectively)

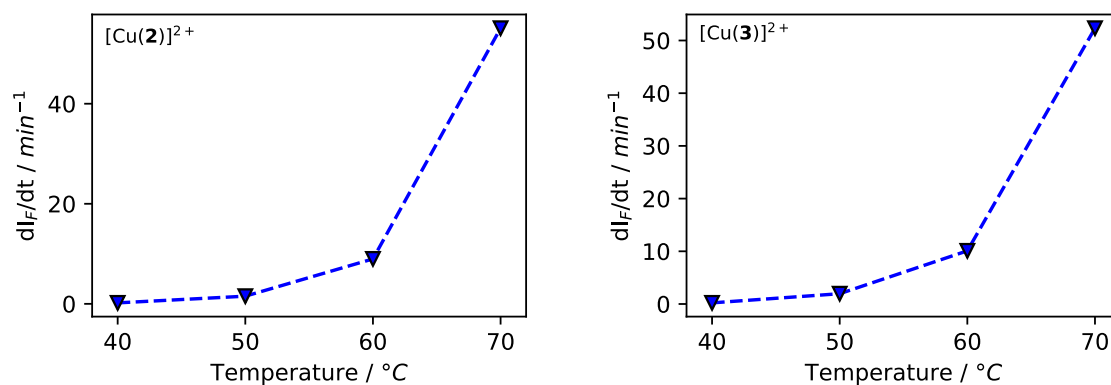

**Figure S12.** Effect of temperature on the decomposition rate of  $[\text{Cu(2)}]^{2+}$  (left) and  $[\text{Cu(3)}]^{2+}$  (right) in water at pH 7.2.

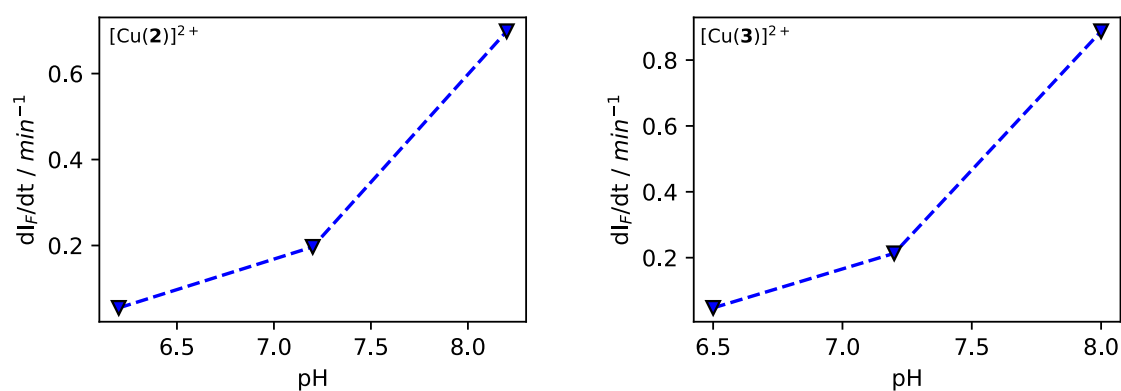

**Figure S13.** Effect of pH on the decomposition rate of  $[\text{Cu(2)}]^{2+}$  (left) and  $[\text{Cu(3)}]^{2+}$  (right) in water at 40°C.

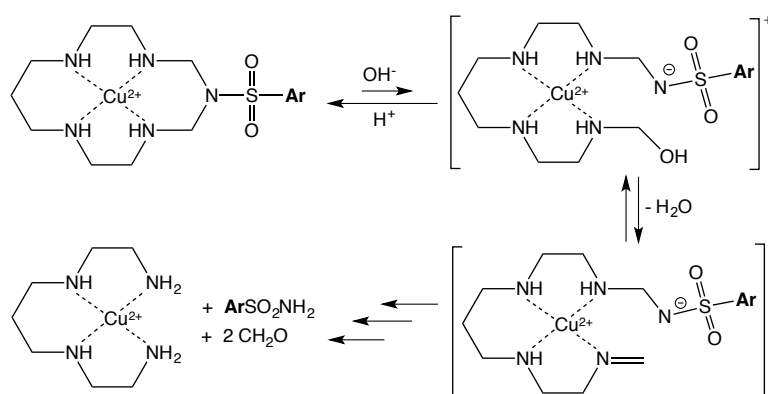

**Scheme S1.** Hypothesized mechanism for the decomposition of  $[\text{Cu(azacyclam)}]^{2+}$  complexes in water displaying the nucleophilic behaviour of  $\text{OH}^-$ .

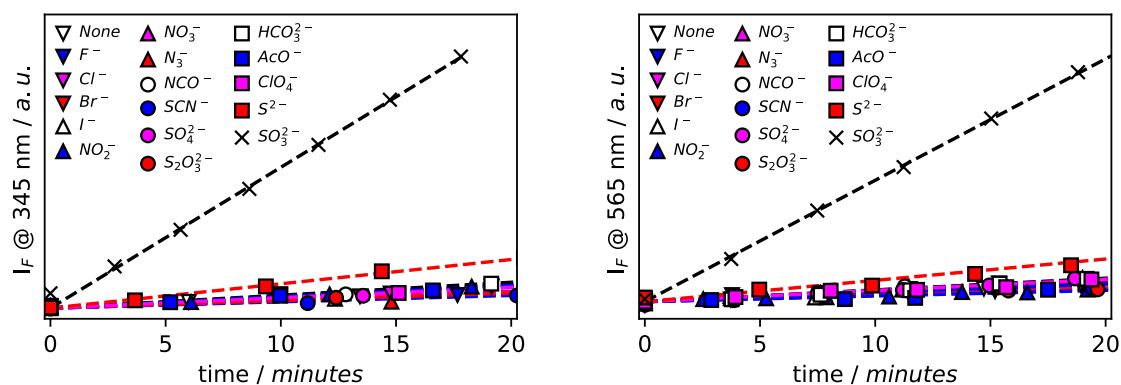

**Figure S14.** Decomposition of  $[\text{Cu}(\mathbf{2})]^{2+}$  (left) and  $[\text{Cu}(\mathbf{3})]^{2+}$  (right)  $2 \times 10^{-5}$  M in the presence of different anions.  $I_F$  monitoring has been limited to the first 20 min.

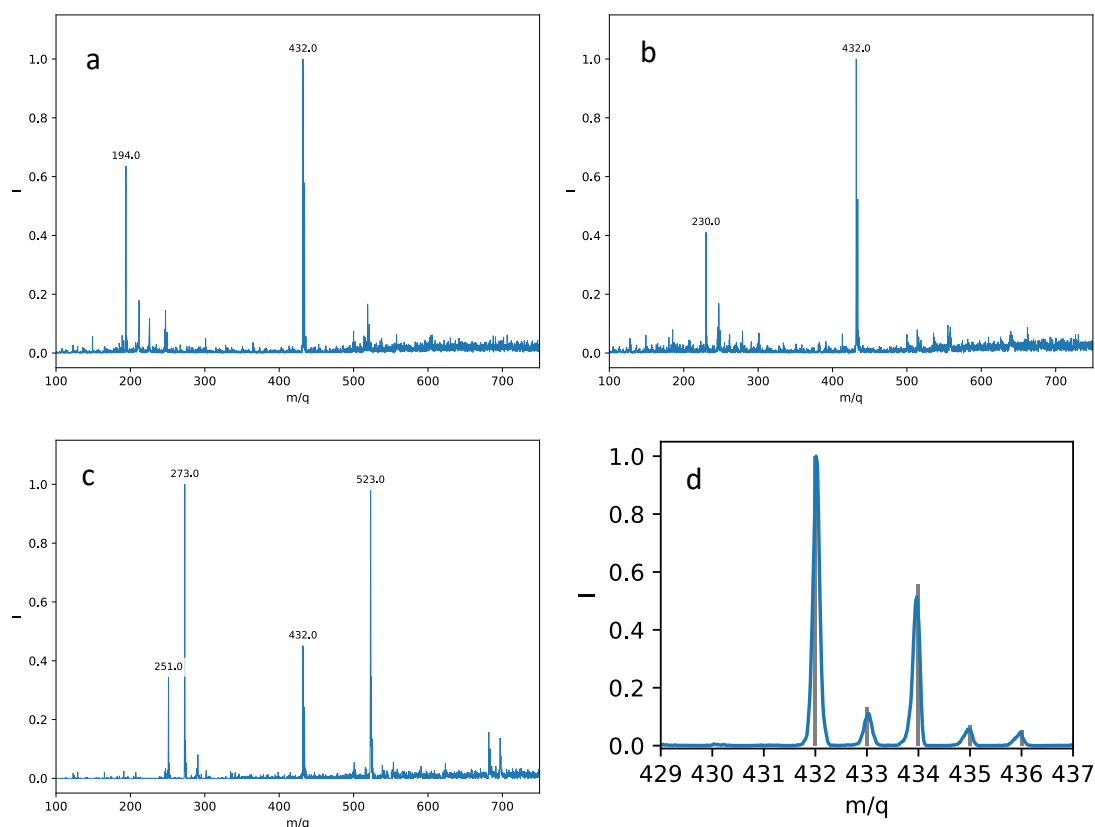

**Figure S15.** ESI-MS spectra of aqueous solutions of the investigated copper(II) azacyclam complexes ( $2.6 \times 10^{-3}$  M) after decomposition with excess sulfite ( $2.6 \times 10^{-2}$  M).

- (a)  $[\text{Cu}(\mathbf{1})](\text{NO}_3)_2$  ( $m/z = 194$ ,  $\{p\text{-toluensulfonamide} + \text{Na}\}^+$ ; 432,  $\{[\text{Cu}(\mathbf{4})]^0 + \text{Na}\}^+$ .  
 (b)  $[\text{Cu}(\mathbf{2})](\text{NO}_3)_2$  ( $m/z = 230$ ,  $\{2\text{-naphthalenesulfonamide} + \text{Na}\}^+$ ; 432,  $\{[\text{Cu}(\mathbf{4})]^0 + \text{Na}\}^+$ .  
 (c)  $[\text{Cu}(\mathbf{3})](\text{ClO}_4)_2$  ( $m/z = 251$ ,  $\{\text{dansylamide} + \text{H}\}^+$ ; 273,  $\{\text{dansylamide} + \text{Na}\}^+$ ; 432,  $\{[\text{Cu}(\mathbf{4})]^0 + \text{Na}\}^+$ . 523,  $\{2\text{dansylamide} + \text{Na}\}^+$ .  
 (d) Zoom scan spectrum (blue line) related to the peak at  $m/z$  432 compared with the corresponding simulated mass spectrum (grey lines).

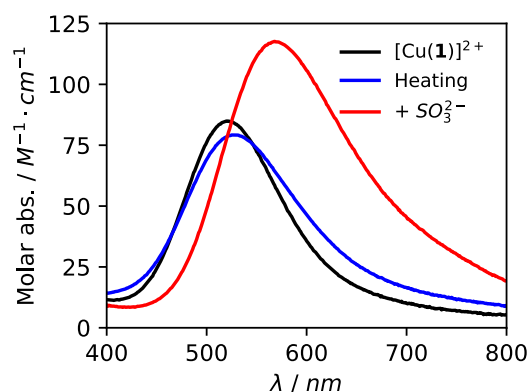

**Figure S16.** Absorption spectrum in the visible range of an aqueous solution of  $[Cu(1)]^{2+}$   $2.6 \times 10^{-3}$  M at pH 7.2 before decomposition (black) and after decomposition (pH 7.2, 40°C) in the absence (red) and in the presence of  $Na_2SO_3$  (blue,  $2.6 \times 10^{-2}$ ).

**Table S2.** Fitting data corresponding to  $dI_F/dt$  vs.  $[SO_3^{2-}]$  for complexes  $[Cu(2)]^{2+}$  and  $[Cu(3)]^{2+}$  (Standard deviation values in brackets)

|                         | $[Cu(2)]^{2+}$                           | $[Cu(3)]^{2+}$                            |
|-------------------------|------------------------------------------|-------------------------------------------|
| $\nu_0$                 | 0.25(4)                                  | 0.19(9)                                   |
| $a$                     | 3.53(6)                                  | 3.44(12)                                  |
| $b$                     | $1.12(6) \times 10^5$                    | $1.63(14) \times 10^5$                    |
| Plateau ( $\nu_0 + a$ ) | 3.78                                     | 3.63                                      |
| LOD                     | $1 \times 10^{-6}$ M (0.035 ppm $SO_2$ ) | $9 \times 10^{-7}$ M (0.03 ppm $SO_2$ )   |
| LOQ                     | $3 \times 10^{-6}$ M (0.1 ppm $SO_2$ )   | $2.6 \times 10^{-6}$ M (0.09 ppm $SO_2$ ) |

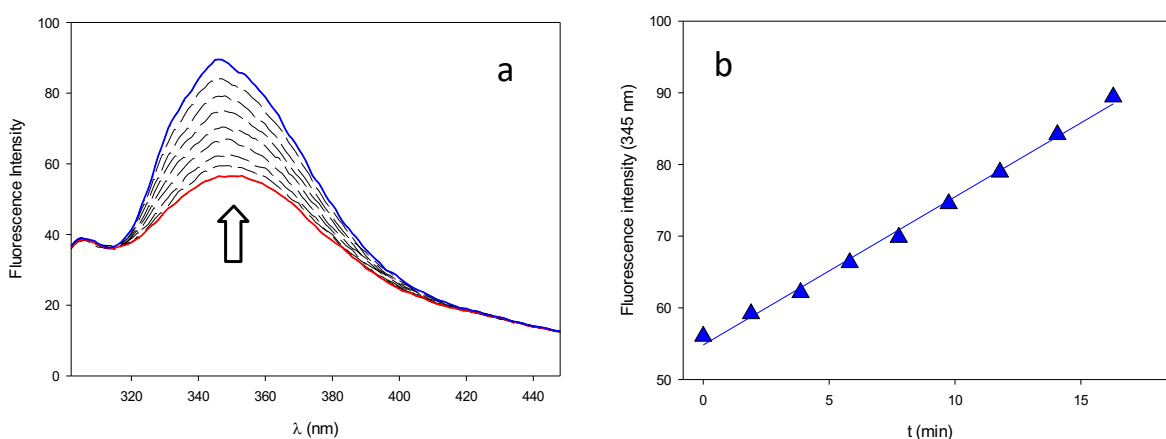

**Figure S17.** (a) Emission spectra collected during the analysis of a white wine sample by using  $[Cu(2)]^{2+}$  ( $2 \times 10^{-5}$  M; pH=7.2; T=40 °C) as chemical probe for sulfite and (b) the resulting fluorescence intensity vs. time plot.

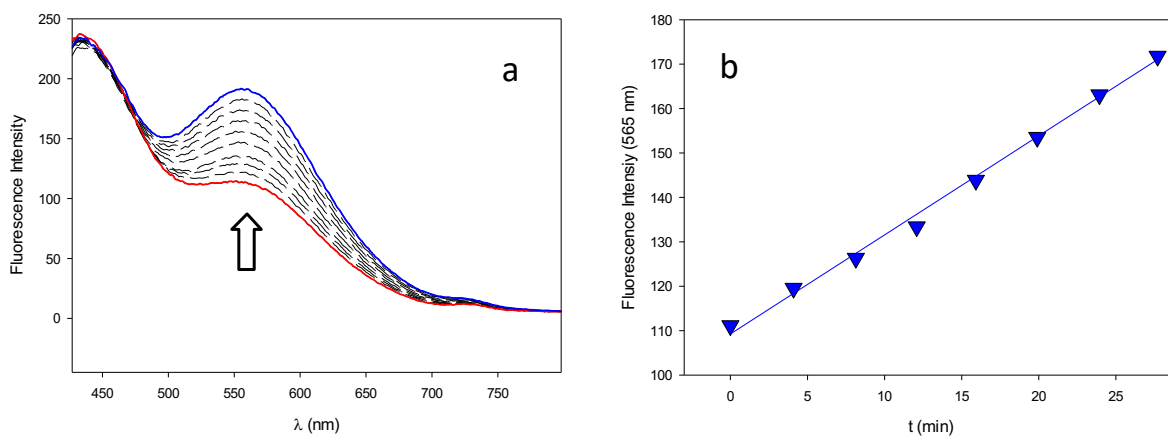

**Figure S18.** (a) Emission spectra collected during the analysis of a white wine sample by using  $[\text{Cu}(\mathbf{3})]^{2+}$  ( $2 \times 10^{-5}$  M; pH=7,2; T=40 °C) as chemical probe for sulfite and (b) the resulting fluorescence intensity vs. time plot.
